# Supplementary material
Source: Springer Nature journal article supplement (https://www.springermedizin.de/resource/supplementary/12955_2011_970_MOESM1_ESM.pdf/9558886)

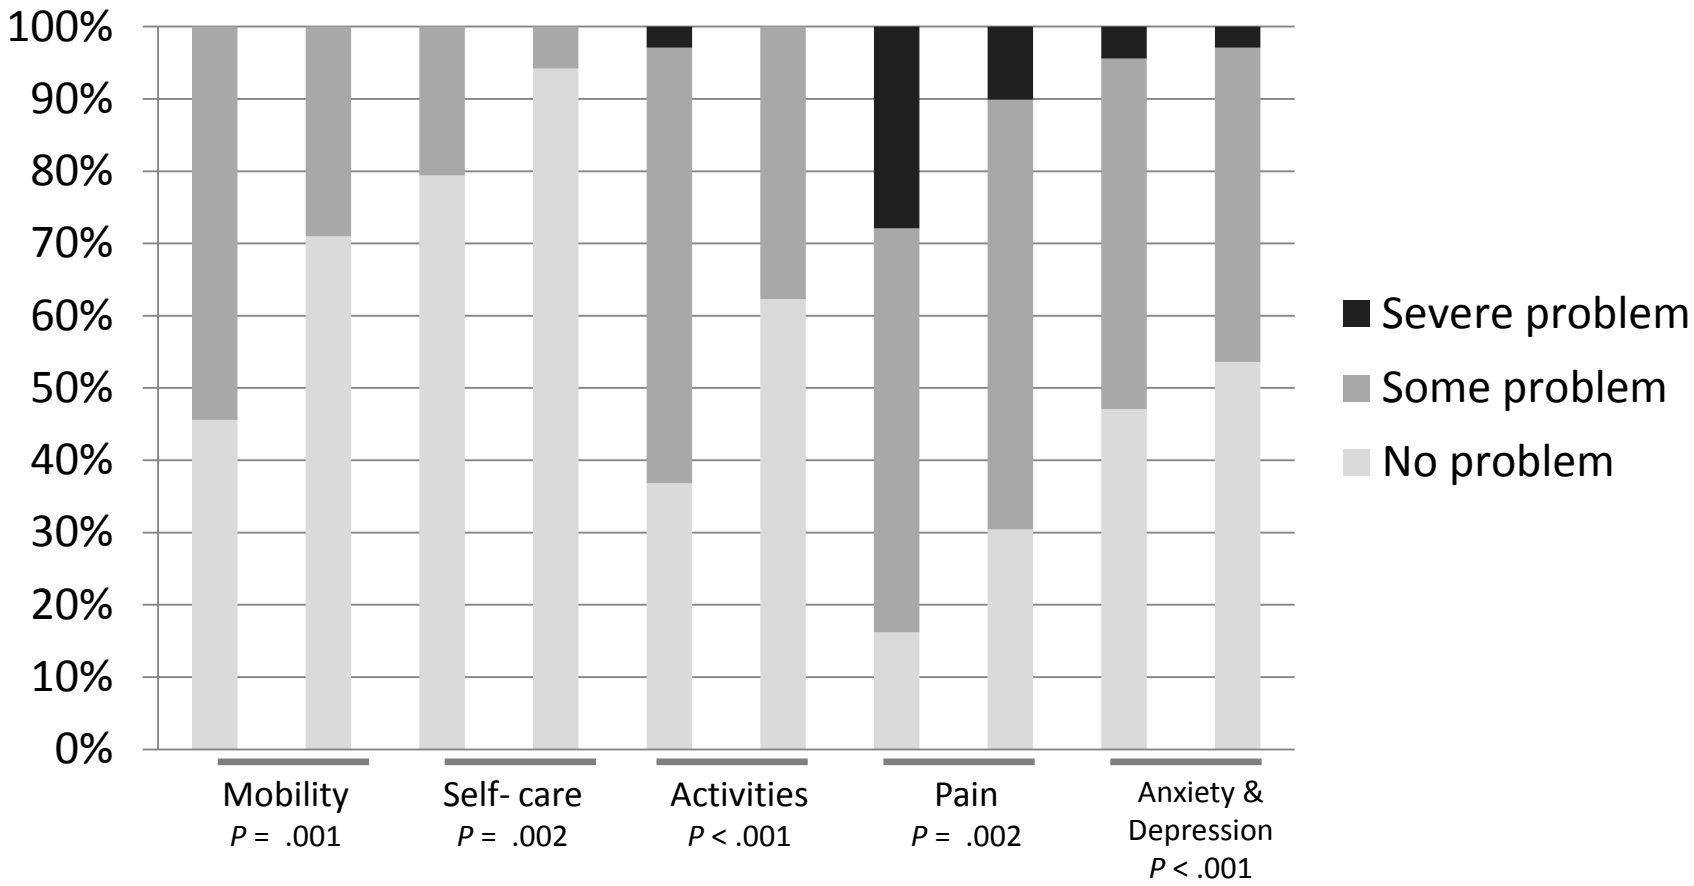

Supplement: MOESM1 [file 9558886]
